# Supplementary material for: Compositional and structural control in LLZO solid electrolytes
Source: Royal Society of Chemistry journal article supplement (doi:10.1039/d2ra03303h), 2022-01-01
Supplement: d2ra03303h1.pdf [file d2ra03303h1.pdf]

## Supporting Information

### Compositional and structural control in LLZO solid electrolytes

*Kade Parascos<sup>1\*</sup>, Joshua L. Watts<sup>1</sup>, Jose A. Alarco<sup>2</sup>, Yan Chen<sup>3</sup> and Peter C. Talbot<sup>1</sup>*

<sup>1</sup> National Battery Testing Centre, Queensland University of Technology, Brisbane, QLD  
4001, Australia

<sup>2</sup> Centre for Clean Energy Technologies and Practices, Centre for Materials Science,  
Queensland University of Technology, Brisbane 4001, Australia

<sup>3</sup> Neutron Scattering Division, Oak Ridge National Laboratory, Oak Ridge, TN 37831, USA

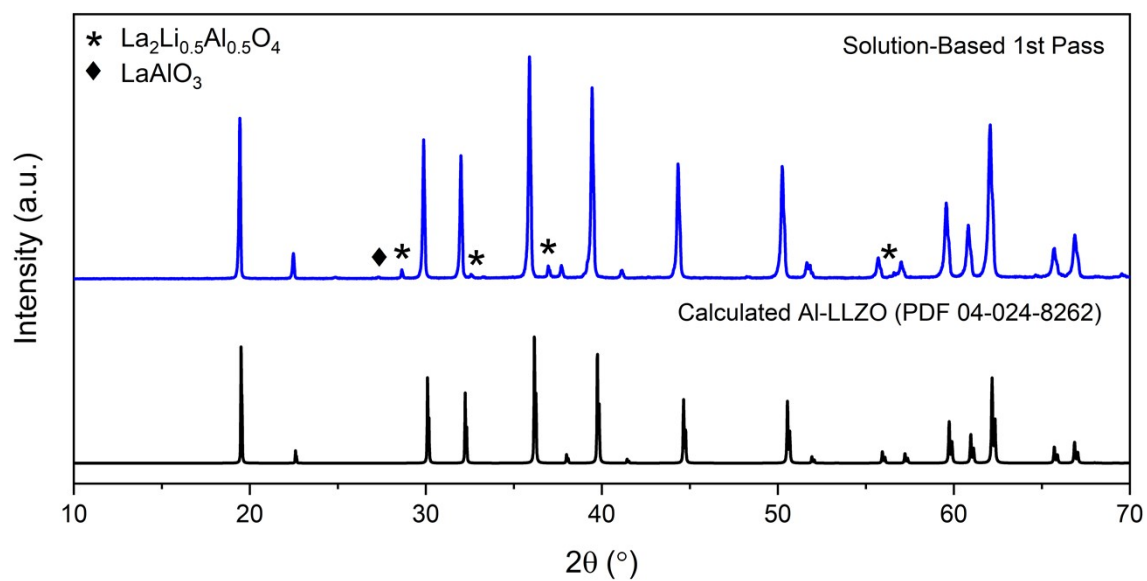

**Figure S1.** XRD pattern for calcined Al-LLZO powders for the SB sample with 0wt% excess Zr-precursor. The theoretical diffraction pattern of cubic Al-LLZO is included for reference.

**Table S1.** ICP-OES data for Al-LLZO samples with varying dopant contents where nominal stoichiometry was based on  $\text{Li}_{7-3x}\text{Al}_x\text{La}_3\text{Zr}_2\text{O}_{12}$ . Data has been normalized to La. Chemical formulae have been calculated from molar ratios and oxygen content has been estimated from charge balance calculations.

| Nominal Al Content $x$ (mol pfu) | Measured Al Content $x$ (mol pfu) | Nominal Al wt% | Measured Al wt% | Li/La | Al/La | Zr/La | Chemical Formula                                                              |
|----------------------------------|-----------------------------------|----------------|-----------------|-------|-------|-------|-------------------------------------------------------------------------------|
| 0                                | 0                                 | 0              | 0               | 2.69  | 0     | 0.54  | $\text{Li}_{8.08}\text{La}_3\text{Zr}_{1.62}\text{O}_{11.78}$                 |
| 0.12                             | 0.12                              | 0.39           | 0.38            | 2.53  | 0.04  | 0.60  | n/a <sup>†</sup>                                                              |
| 0.18                             | 0.18                              | 0.58           | 0.59            | 2.47  | 0.06  | 0.61  | $\text{Li}_{7.41}\text{Al}_{0.18}\text{La}_3\text{Zr}_{1.84}\text{O}_{12.16}$ |
| 0.24                             | 0.25                              | 0.77           | 0.80            | 2.39  | 0.08  | 0.63  | $\text{Li}_{7.16}\text{Al}_{0.25}\text{La}_3\text{Zr}_{1.89}\text{O}_{12.23}$ |
| 0.3                              | 0.32                              | 0.96           | 1.02            | 2.37  | 0.11  | 0.63  | n/a <sup>††</sup>                                                             |
| 0.36                             | 0.38                              | 1.15           | 1.22            | 2.28  | 0.13  | 0.60  | n/a <sup>††</sup>                                                             |

<sup>†</sup>Composite of cubic and tetragonal LLZO phases

<sup>††</sup>Impurities  $\text{LaAlO}_3$  and  $\text{La}_2\text{Zr}_2\text{O}_7$  present (see Figure S2)

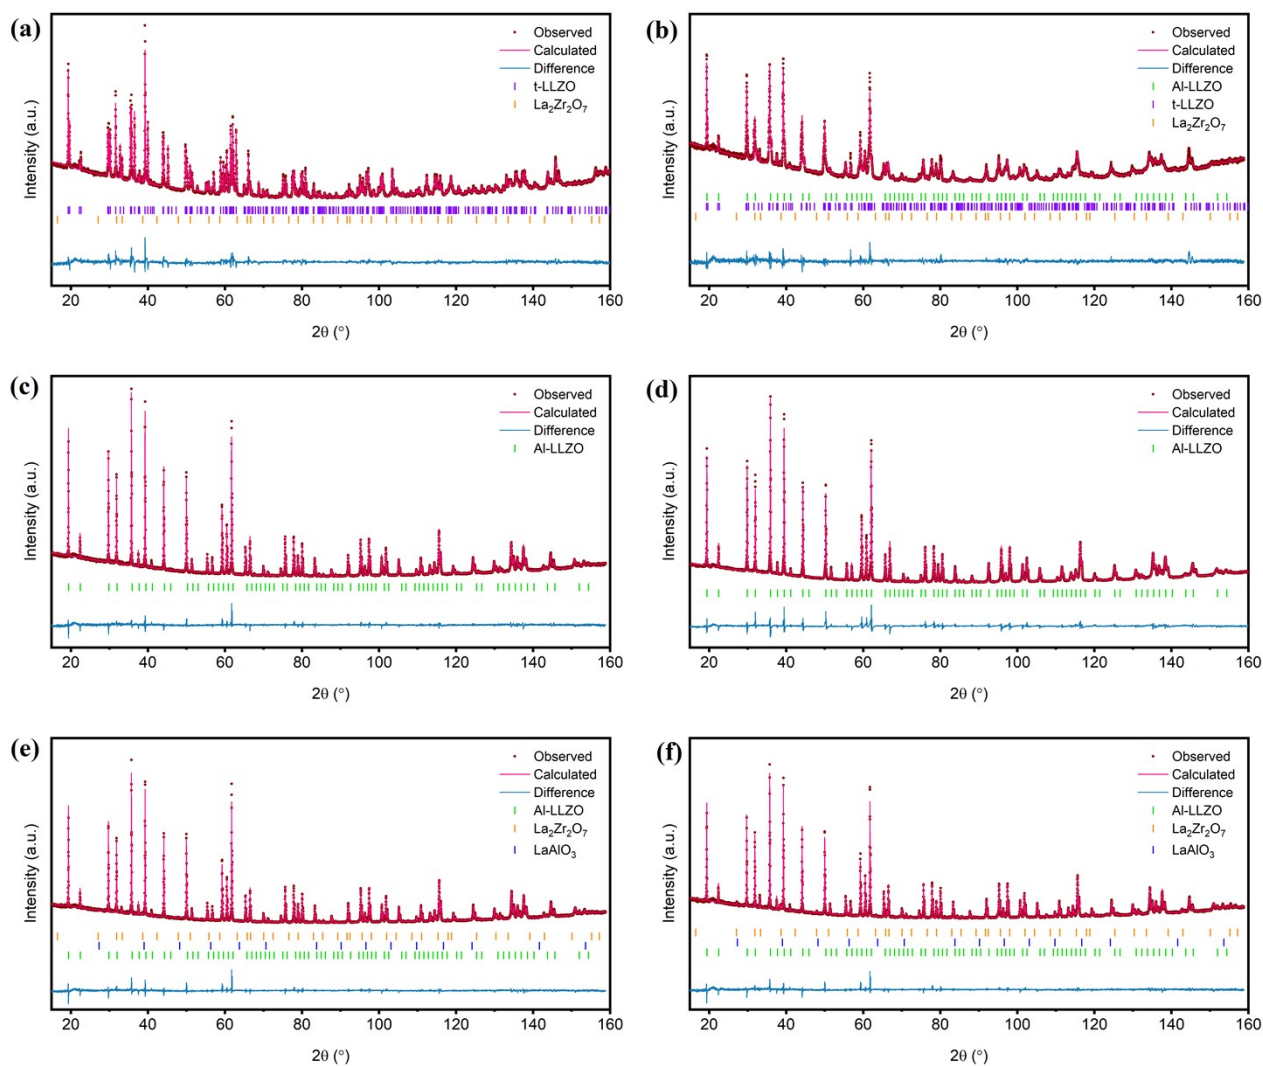

**Figure S2.** Rietveld refinement plots for calcined LLZO samples prepared by the SB method with an Al content (mol pfu) of (a) 0, (b) 0.12, (c) 0.18, (d) 0.24, (e) 0.3 and (f) 0.36.
